# Supplementary material
Source: publisher figshare collection journal article supplement (https://acs.figshare.com/ndownloader/files/16353392)
Supplement: Supplementary file 1 [file 16353392]

**Supporting information**

**In Situ Synthesis of Amino Acid Functionalized Carbon Dots with Tunable  
Properties and their Biological Applications**

***Subrata Pandit, Pradipta Behera, Jagabandhu Sahoo and Mrinmoy De\****

*Department of Organic Chemistry, Indian Institute of Science, Bangalore-560094, India*

*Email: [md@iisc.ac.in](mailto:md@iisc.ac.in)*

## Transmission Electron Microscopy (TEM):

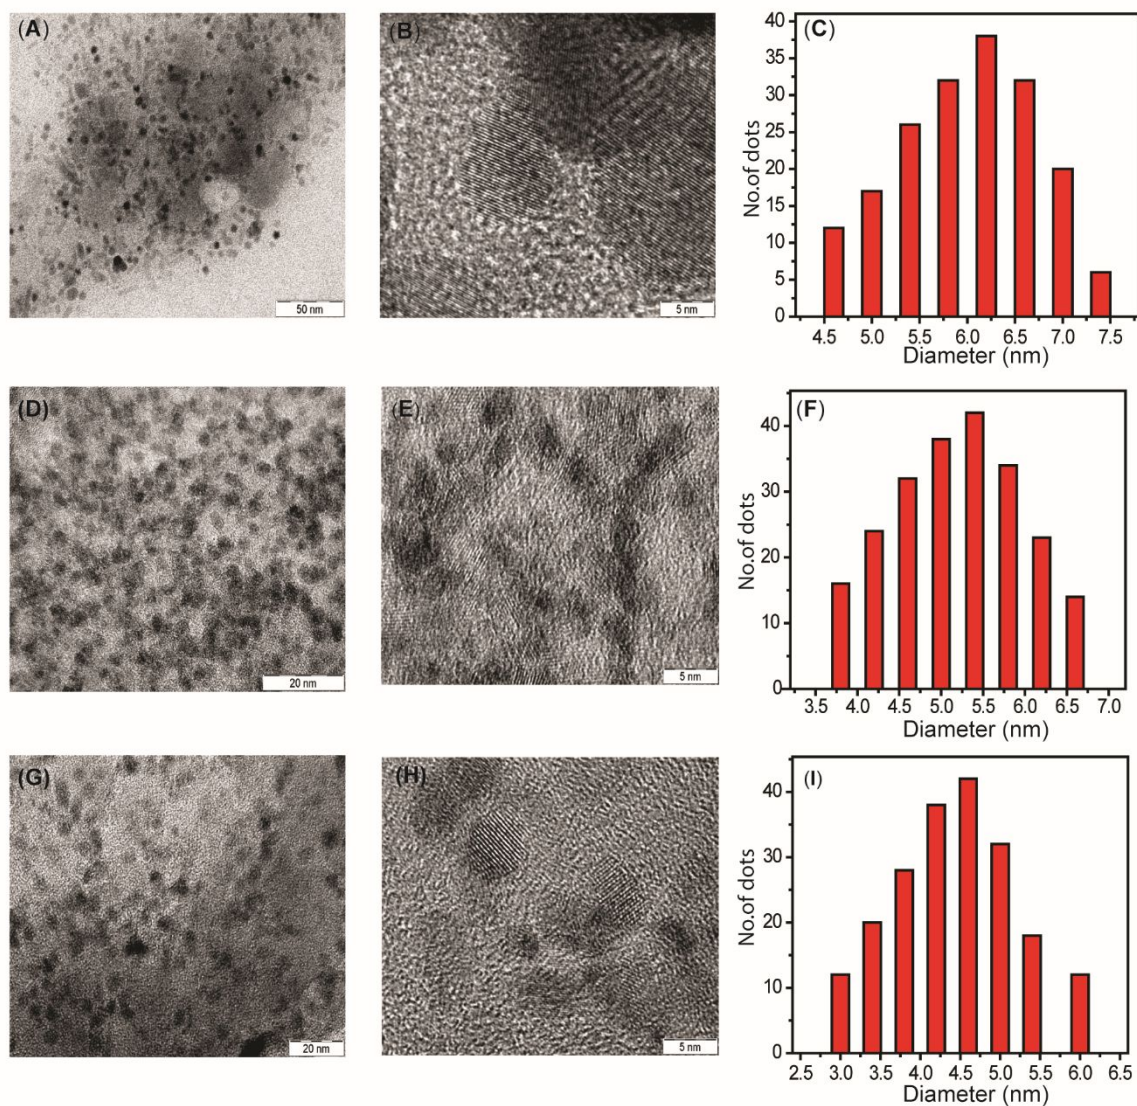

**Figure S1.** Transmission Electron Microscopy (TEM) image of amino acid functionalized carbon dots Phe C-Dots (A), His C-Dots (D) and Tyr C-Dots (G), HRTEM image of (B), (E) and (H), also size distribution plot of (C), (F) and (I) respective amino acids

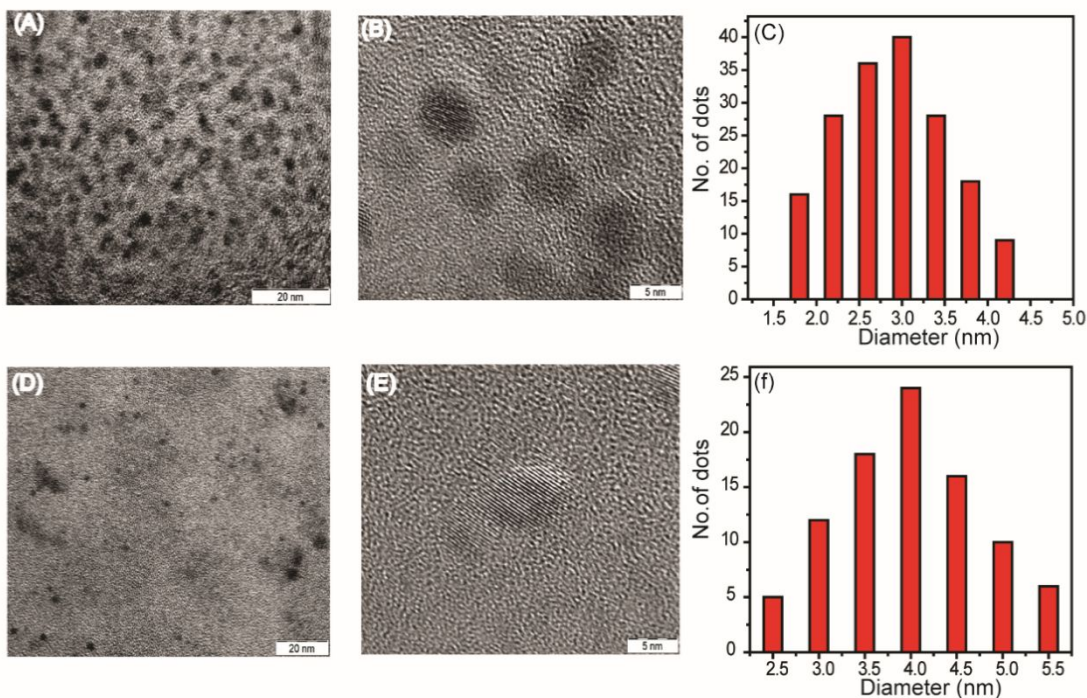

**Figure S2.** Transmission Electron Microscopy (TEM) image of amino acid functionalized carbon dots Arg C-Dots (A) and Cys C-Dots (D), HRTEM image of (B) and (E) also size distribution plot of (C) and (F) respective amino acids.

#### NMR Spectrum:

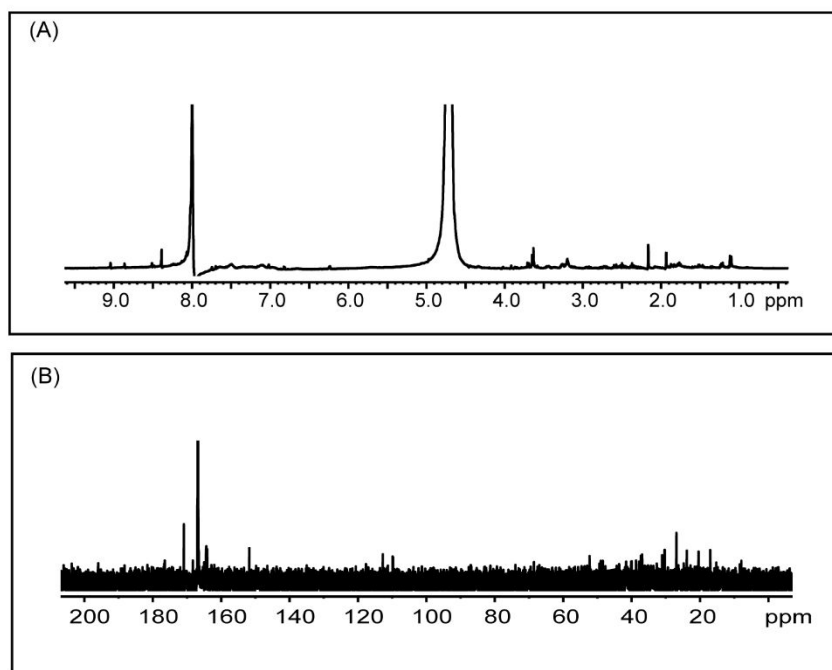

**Figure S3.** Nuclear Magnetic Resonance (NMR) Spectrum of Arg C-Dots (A)  $^1\text{H}$  and (B)  $^{13}\text{C}$  in  $\text{D}_2\text{O}$  solvent (overnight scan)

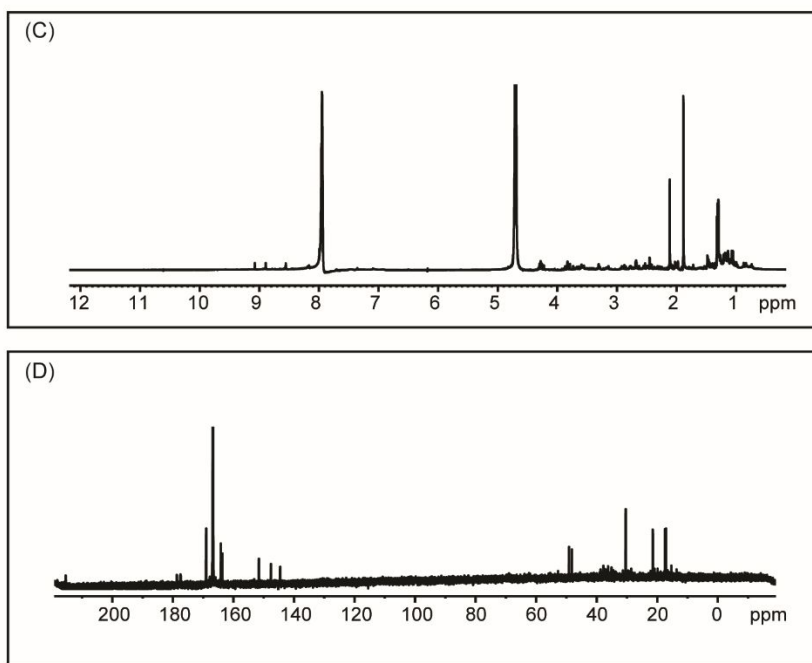

**Figure S4.** Nuclear Magnetic Resonance (NMR) Spectrum of Cys C-Dots (C)  $^1\text{H}$  and (D)  $^{13}\text{C}$  in  $\text{D}_2\text{O}$  solvent (overnight scan)

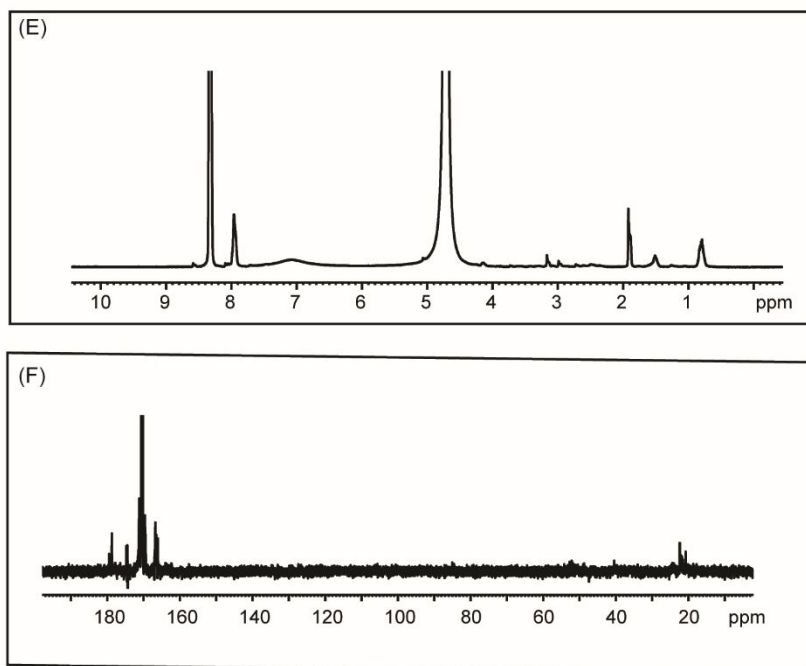

**Figure S5.** Nuclear Magnetic Resonance (NMR) Spectrum of Leu C-Dots (E)  $^1\text{H}$  and (F)  $^{13}\text{C}$  in  $\text{D}_2\text{O}$  solvent (overnight scan)

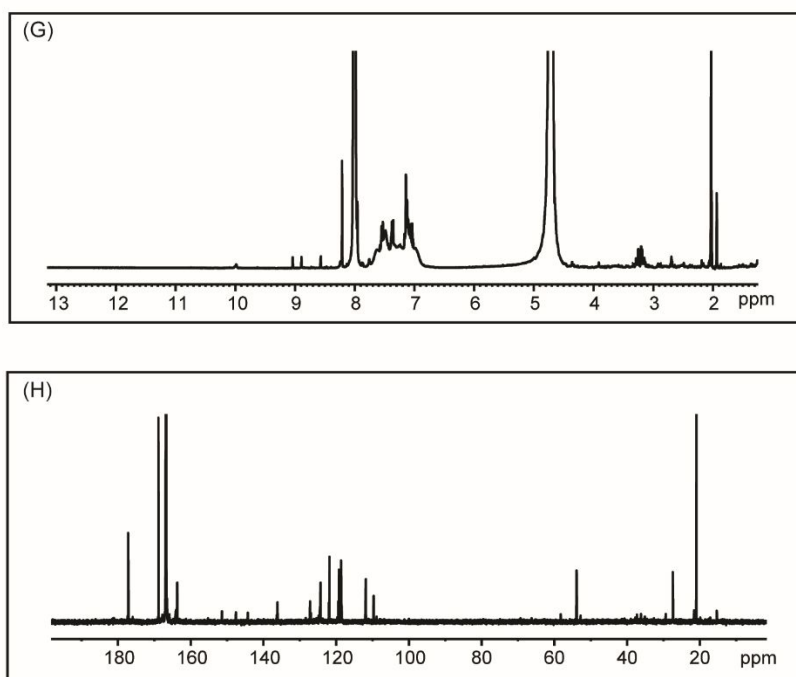

**Figure S6.** Nuclear Magnetic Resonance (NMR) Spectrum of Trp C-Dots (G)  $^1\text{H}$  and (H)  $^{13}\text{C}$  in  $\text{D}_2\text{O}$  solvent (overnight scan)

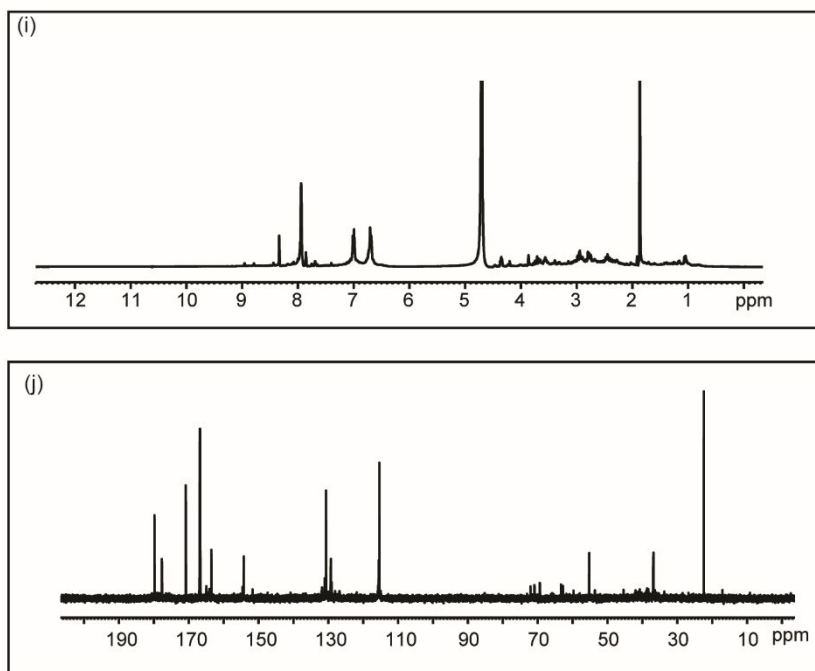

**Figure S7.** Nuclear Magnetic Resonance (NMR) Spectrum of Tyr C-Dots (I)  $^1\text{H}$  and (J)  $^{13}\text{C}$  in  $\text{D}_2\text{O}$  solvent (overnight scan)

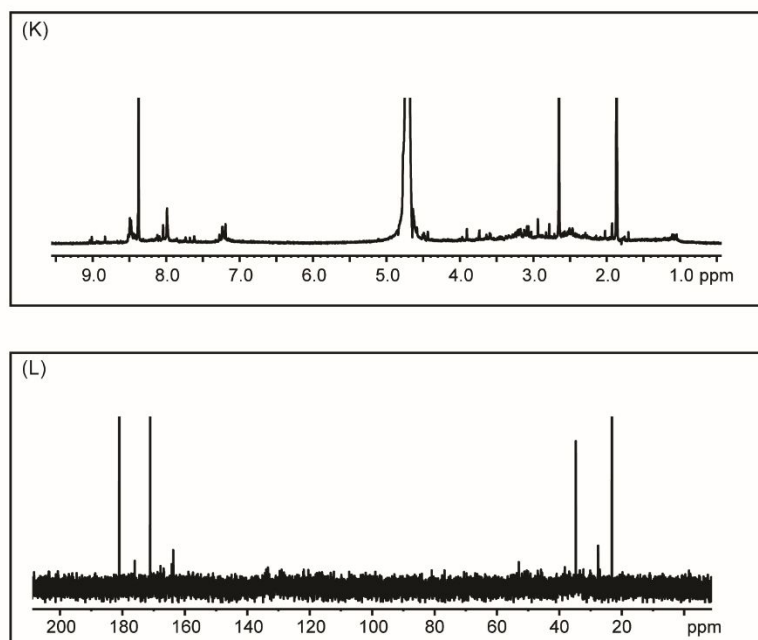

**Figure S8.** Nuclear Magnetic Resonance (NMR) Spectrum of His C-Dots (K)  $^1\text{H}$  and (L)  $^{13}\text{C}$  in  $\text{D}_2\text{O}$  solvent (overnight scan)

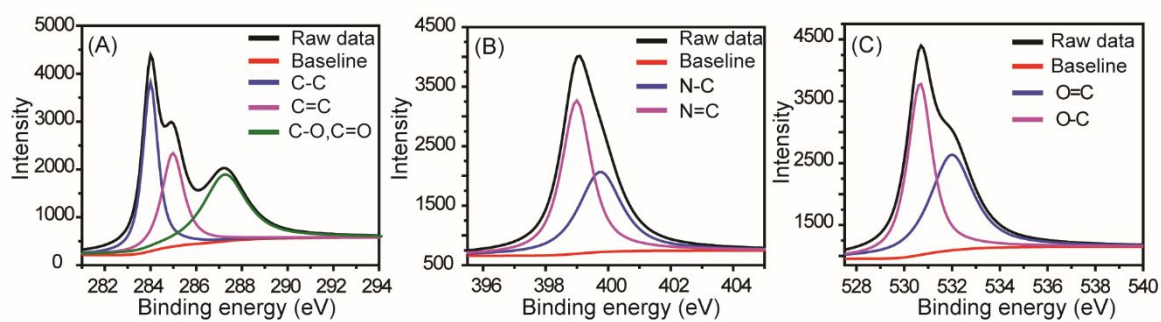



**Figure S9.** High resolution deconvoluting XPS Spectrum (A) C1s (B) N1s and (C) O1s of Arg C-Dots with black line (Raw data) and red line (baseline).

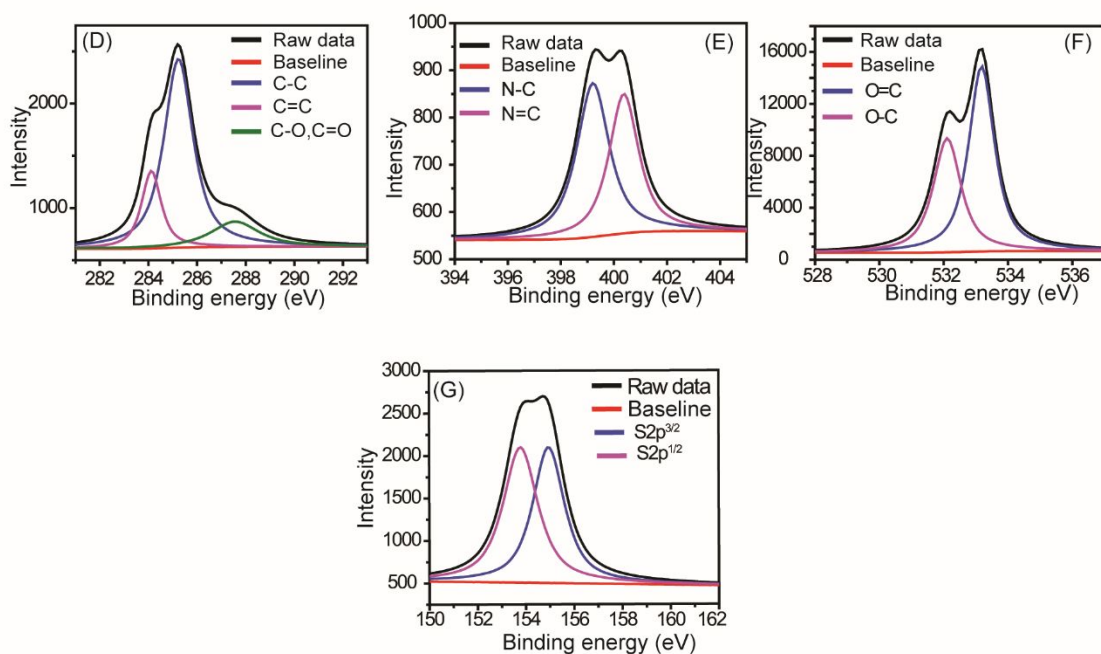

**Figure S10.** High resolution deconvoluting XPS Spectrum (D) C1s (E) N1s (F) O1s and (G) S2p of Cys C-Dots with black line (Raw data) and red line (baseline).

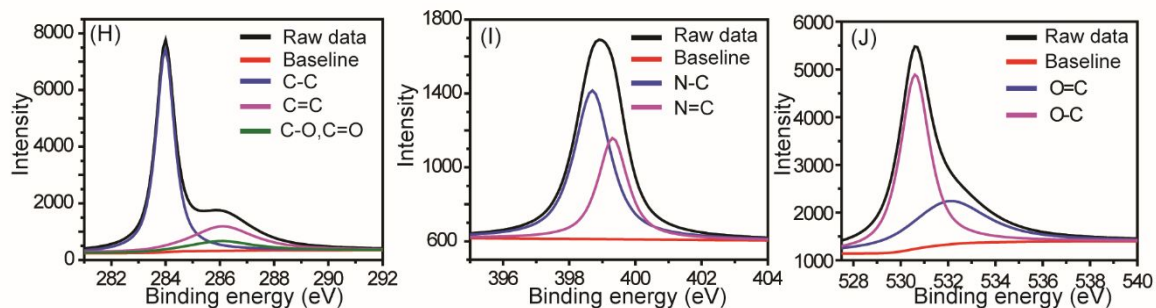

**Figure S11.** High resolution deconvoluting XPS Spectrum (H) C1s (I) N1s and (J) O1s of Leu C-Dots with black line (Raw data) and red line (baseline).

**Figure S12.** High Resolution deconvoluting XPS Spectrum (K) C1s (L) N1s and (M) O1s of His C-Dots with black line (Raw data) and red line (baseline).

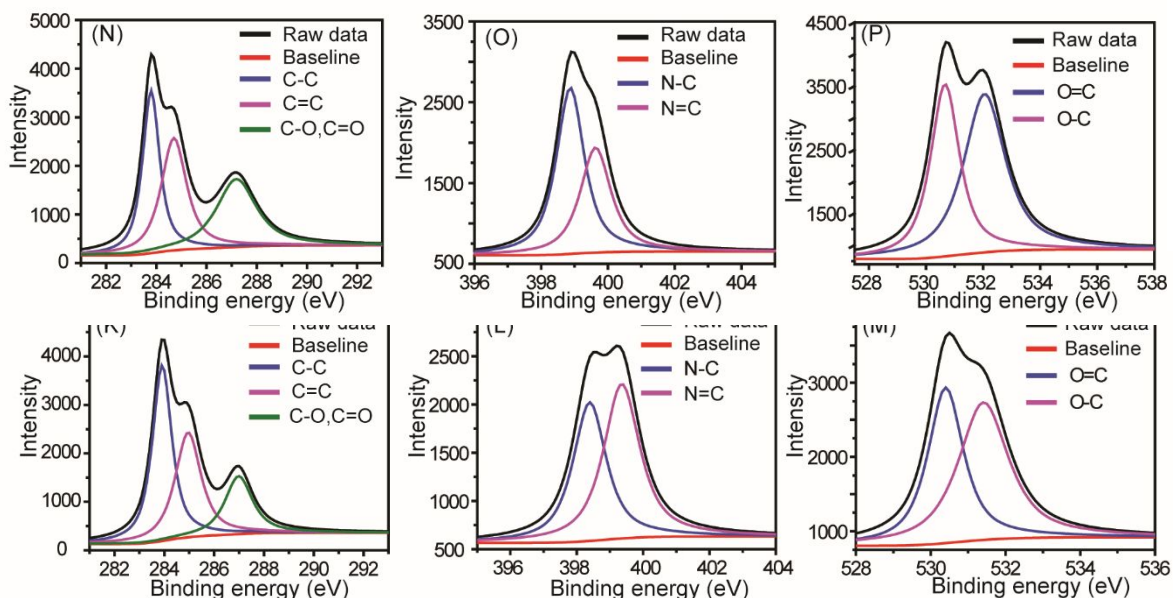

**Figure S13.** High resolution deconvoluting XPS Spectrum (N) C1s (O) N1s and (P) O1s of Phe C-Dots with black line (Raw data) and red line (baseline).

**Table S1.** Percentage of elements present in different amino acids functionalized C-Dots.

| Elements (%) | C     | N     | O     | S    |
|--------------|-------|-------|-------|------|
| Arg          | 68.56 | 17.37 | 14.07 | 0    |
| Trp          | 69.96 | 14.43 | 15.61 | 0    |
| His          | 73.71 | 14.21 | 12.08 | 0    |
| Cys          | 30.04 | 9.54  | 54.87 | 5.55 |
| Glu          | 71.98 | 13.33 | 14.69 | 0    |
| Leu          | 75.04 | 8.16  | 16.79 | 0    |

**pXRD Study:**

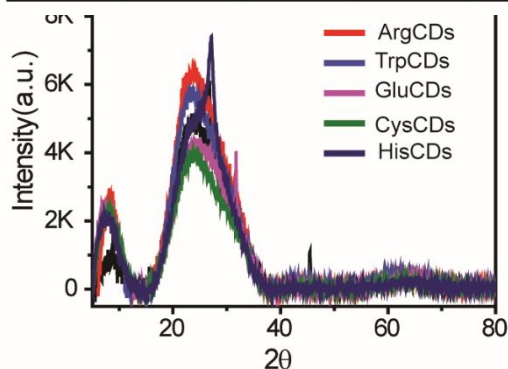



**Figure S14.** Powder X-Ray Diffraction (pXRD) of amino acids functionalized carbon dots Leu C-Dots (black), Arg C-Dots (red), Trp C-Dots (blue), Glu C-Dots (pink), Cys C-Dots (green) and His C-Dots (navy).

## Fluorescence Spectra:

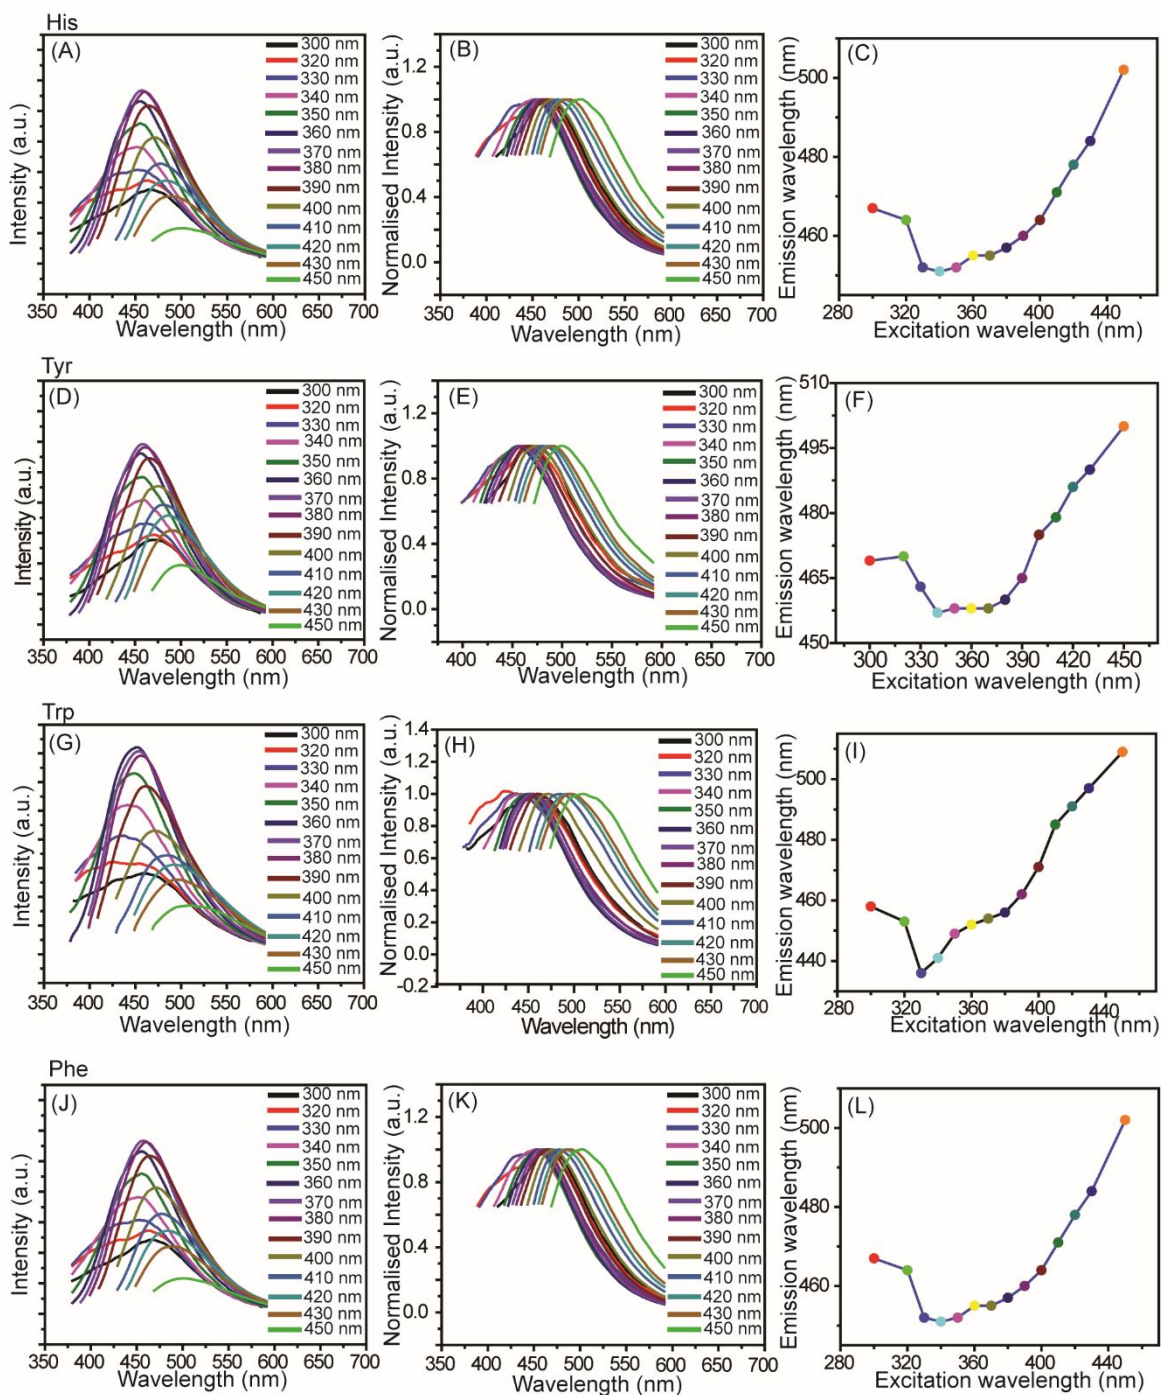

**Figure S15.** Fluorescence Spectra of all aromatic moiety amino acids functionalized carbon dots different excitation dependent fluorescence spectra, normalized spectra and excitation dependent emission spectra (A, B and C) for His C-Dots, (D, E, and F) for Tyr C-Dots, (G, H and I) for Trp C-Dots, (J, K and L) for Phe C-Dots respectively.

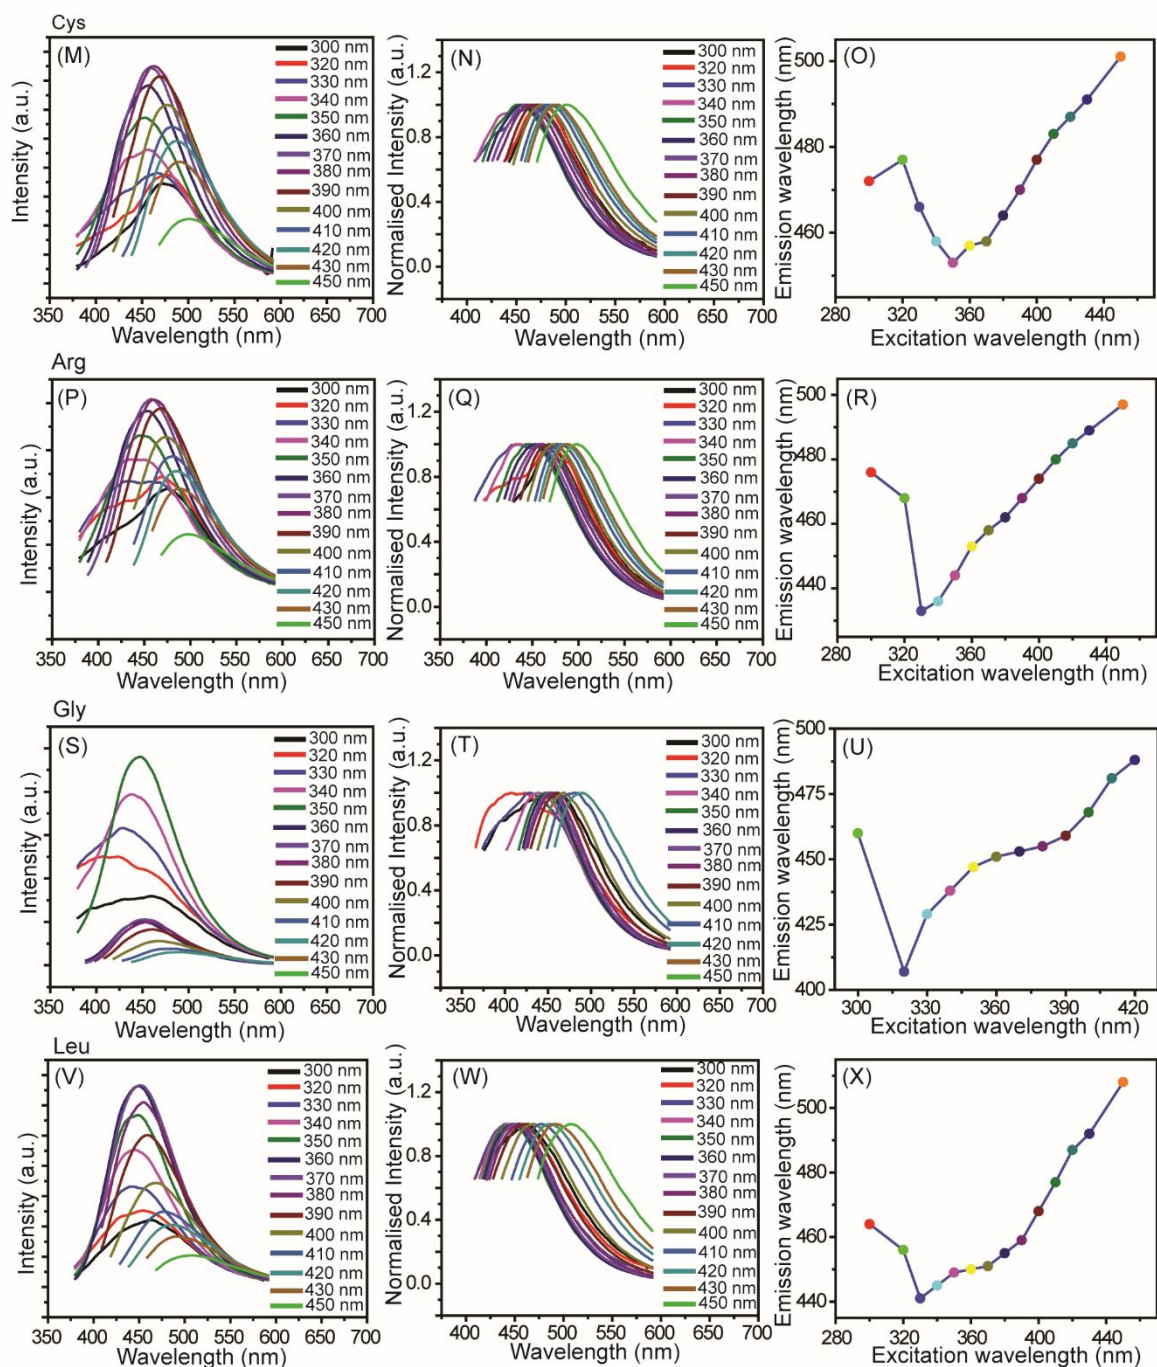

**Figure S16.** Fluorescence Spectra of side chain moiety amino acids functionalized carbon dots different excitation dependent fluorescence spectra, normalized spectra and excitation dependent emission spectra (M, N and O) for Cys C-Dots, (P, Q, and R) for Arg C-Dots, (S, T and U) for Gly C-Dots, (V, W and X) for Leu C-Dots respectively.

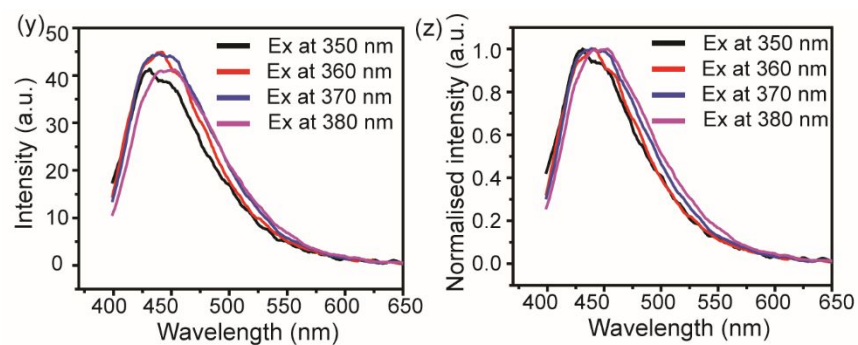

**Figure S17.** Fluorescence Spectra of only Citric acid C-Dots with excitation dependent fluorescence spectra(y); normalized spectra (z) at identical conditions.

### pH Study:

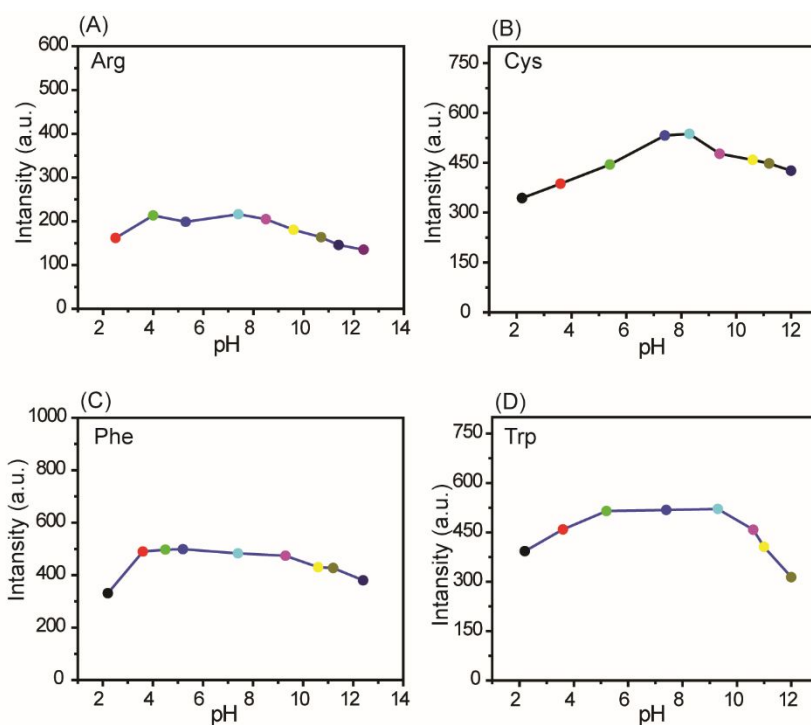

**Figure S18.** pH Stability of amino acids functionalized carbon dots (A) Arg C-Dots, (B) Cys C-Dots, (C) Phe C-Dots and (D) Trp C-Dots at pH range 2.2 to 12.5.

### Cellular cytotoxicity and targeted nucleolus tracking study:

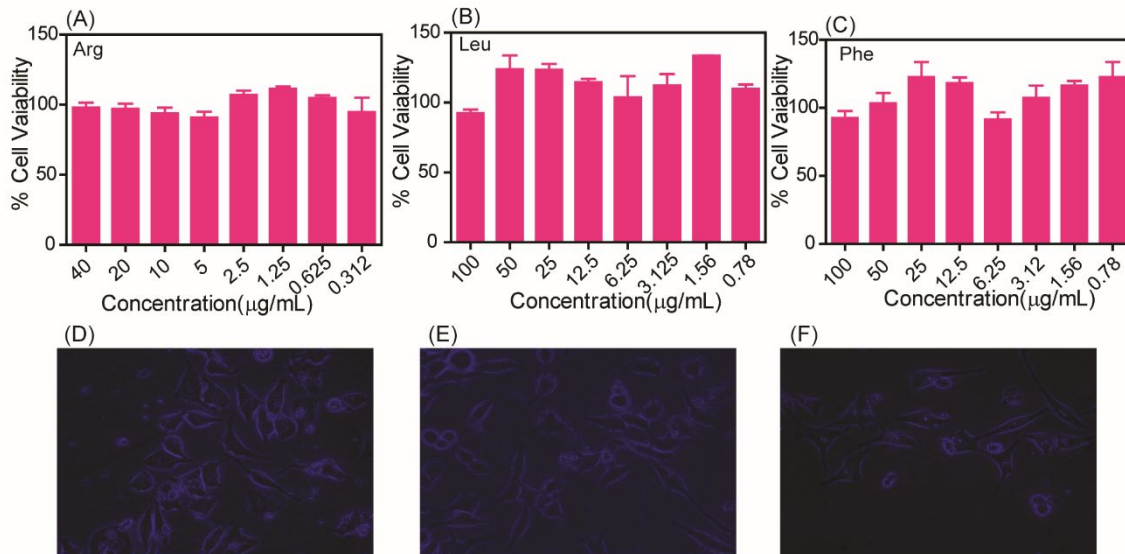

**Figure S19.** HeLa Cell viability study and targeted nucleolus tracking image of amino acids functionalized carbon dots (A, D) Arg C-Dots, (B, E) Leu C-Dots and (C, F) Phe C-Dots respectively.

**Table S2.** Five different proteins with diverse molecular weight and charge were chosen for the sensing experiment.

| Protein names  | Molecular weight in kDa. | pI   | Molar Ex. Coefficient |
|----------------|--------------------------|------|-----------------------|
| CHYMOTRYPSIN   | 25                       | 8.7  | 51000                 |
| CYTOCHROME C   | 12.3                     | 10.7 | 23200                 |
| LIPASE         | 58                       | 5.6  | 54350                 |
| XYLANASE       | 23.6                     | 3.8  | 68000                 |
| BETA GLUCANASE | 179.3                    | 5.42 | 294930                |
